# Supplementary material
Source: Copernicus journal article supplement (doi:10.5194/egusphere-2026-2702)
Supplement: Supplementary file 1 [file egusphere-2026-2702-supplement.pdf]

1 **Supplementary Material**

2 **Evaluating low-cost NDIR CO<sub>2</sub> for atmospheric**  
3 **observation in rural settings**

4 Olalekan A.M. Popoola\*<sup>1</sup>, Paolo Cicuta<sup>1</sup>, Rachel H. Georgiou<sup>1</sup>, Lawrence Tom<sup>1</sup>, Ray  
5 Freshwater<sup>1</sup>, Kelsey Leet<sup>1</sup>, Chiara Giorio\*<sup>1</sup>

6 <sup>1</sup>Yusuf Hamied Department of Chemistry, University of Cambridge, Cambridge, CB2 1EW,  
7 United Kingdom.

8  
9 \*Correspondence to: Olalekan Popoola (oamp2@cam.ac.uk) and Chiara Giorio  
10 (chiara.giorio@atm.ch.cam.ac.uk)

11  
12  
13  
14  
15  
16  
17  
18  
19  
20  
21  
22  
23  
24  
25  
26  
27

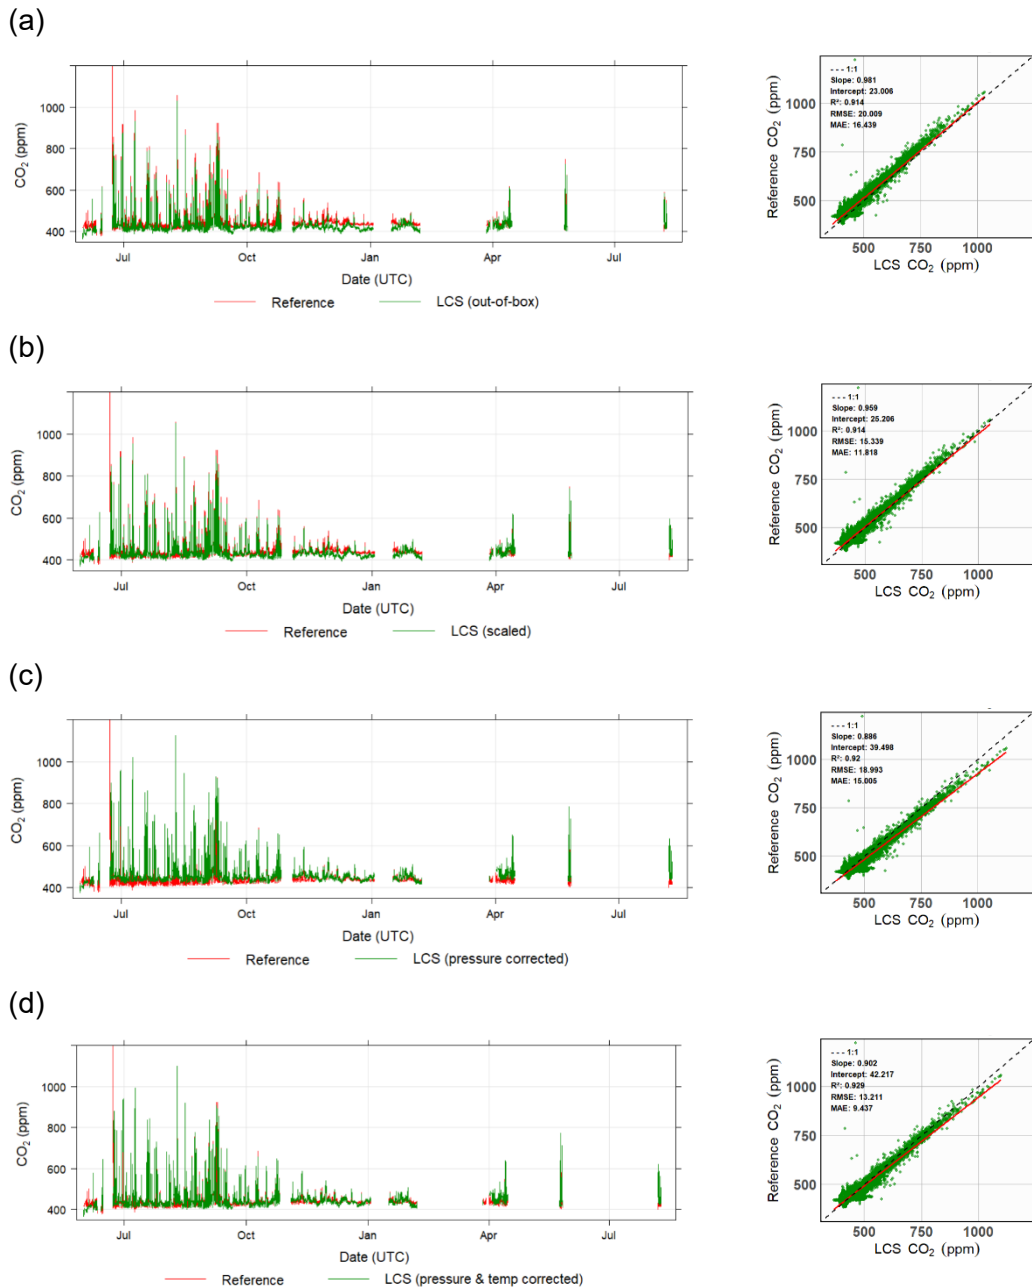

28 **Figure S1: Results of different calibration stages of LCS CO<sub>2</sub> signal for the period 22**  
 29 **May 2023 to 31 August 2024 at the rural location. (a) Factory calibration, (b) simple linear**  
 30 **calibration using a fixed period (1-18 August 2023), (c) pressure only correction of the**  
 31 **out-of-box signal and (d) pressure and temperature correction of out-of-box signal.**  
 32 **Gaps in data are due to power outage and sensor offline due to loss of Wi-Fi**  
 33 **connectivity at the rural site.**

34

35

36

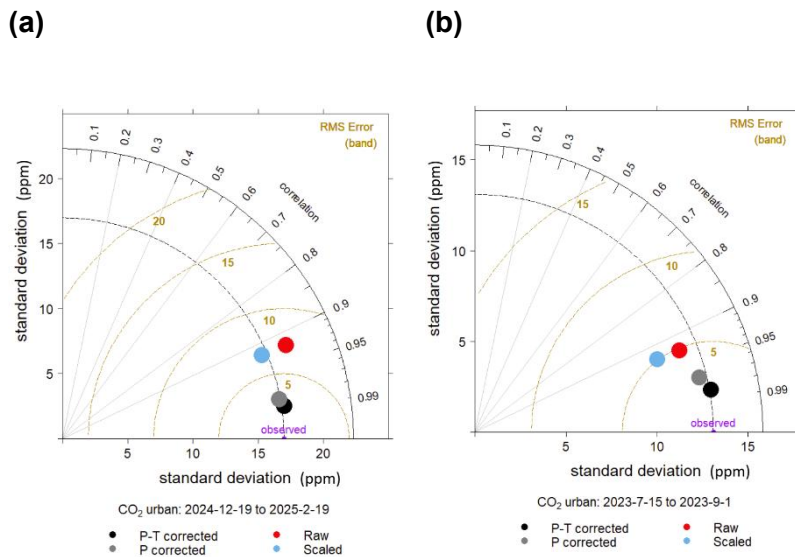

37 **Figure S2: Taylor diagram comparing raw, scaled, pressure corrected, and pressure-**  
 38 **temperature corrected CO<sub>2</sub> measurements with co-located reference observations at**  
 39 **the urban site. Panels show results for (a) 19 December 2024-18 February 2025, and (b)**  
 40 **15 July-31 August 2023. The reference observations are shown as the solid purple semi-**  
 41 **circle (“observed”). Data points located closer to the reference indicate better**  
 42 **agreement with the reference measurements.**

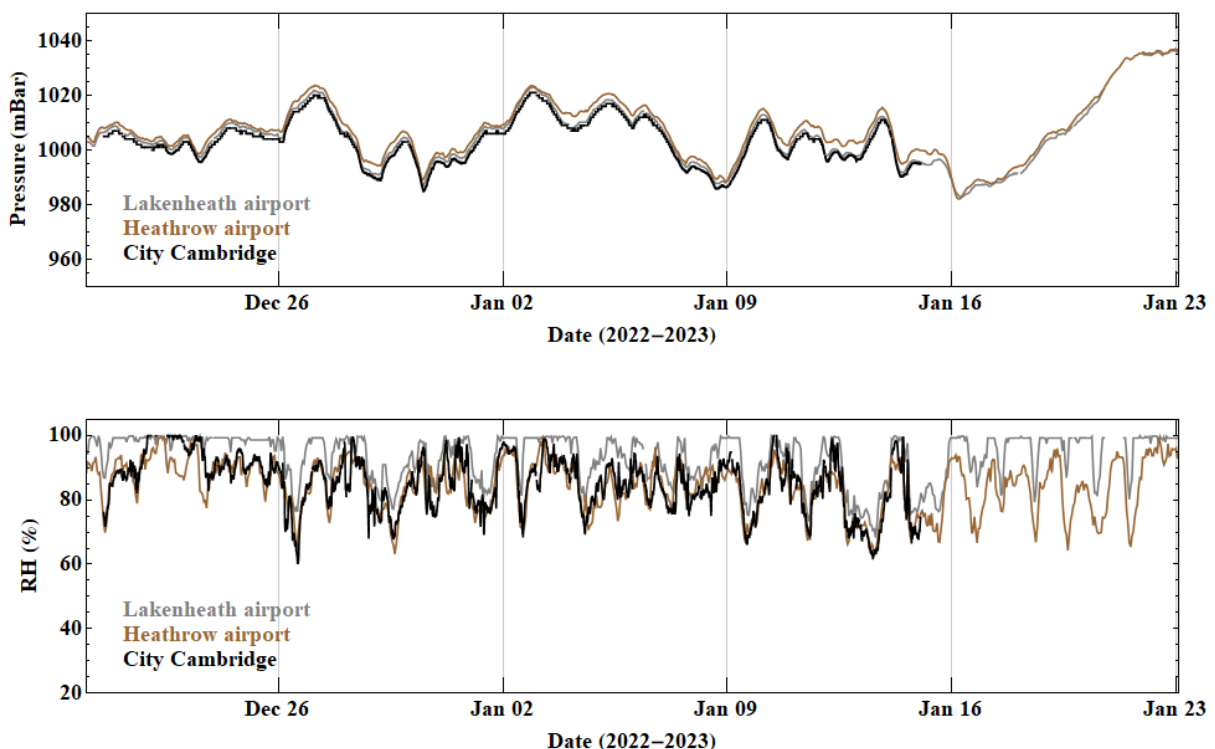

43  
 44 **Figure S3: Ambient pressure and RH reading from two airports (Lakenheath and**  
 45 **London Heathrow) approximately 125 km apart compared to reference meteorological**  
 46 **station at the urban study location which is approximately 15 km from Lakenheath**  
 47 **airport covering the period from 20 December 2022 to 22 January 2023.**

48 **Table S1. Temperature correction fit parameters for the AirGradient (Sunrise CO<sub>2</sub>)**  
49 **sensors used in the network deployment at the rural (farm) location.**

| Node ID | $A_{\text{Sunrise}}$   | $B_{\text{Sunrise}}(\text{K}^{-1})$ |
|---------|------------------------|-------------------------------------|
| 68433   | $-8.42 \times 10^{-3}$ | $3.46 \times 10^{-3}$               |
| 68437   | $6.60 \times 10^{-2}$  | $3.30 \times 10^{-3}$               |
| 68461   | $-2.35 \times 10^{-1}$ | $4.33 \times 10^{-4}$               |
| 68436   | $-1.28 \times 10^{-1}$ | $3.88 \times 10^{-3}$               |

50

51
